# Supplementary material for: Novel oxacalix[2]arene[2]triazines with thermally activated delayed fluorescence and aggregation-induced emission properties
Source: Royal Society of Chemistry journal article supplement (doi:10.1039/c9cc04995a), 2019-01-01
Supplement: c9cc04995a1.pdf [file c9cc04995a1.pdf]

## Electronic Supplementary Information (ESI)

### **Novel oxacalix[2]arene[2]triazines with thermally active delayed fluorescence and aggregation-induced emission properties**

Yin-Feng Wang,<sup>a</sup> Hai-Yan Lu,<sup>a,\*</sup> Yi-Fan Sheng,<sup>a</sup> Meng Li<sup>b</sup> and Chuan-Feng Chen<sup>a,b,\*</sup>

<sup>a</sup>*University of Chinese Academy of Sciences, Beijing 100049, China. E-mail: haiyanlu@ucas.ac.cn*

<sup>b</sup>*Beijing National Laboratory for Molecular Sciences, CAS Key Laboratory of Molecular Recognition and Function, Institute of Chemistry, Chinese Academy of Sciences, Beijing 100190, China. E-mail: cchen@iccas.ac.cn*

#### **Contents**

|                                                                                       |            |
|---------------------------------------------------------------------------------------|------------|
| <b>1. General information</b>                                                         | <b>S2</b>  |
| <b>2. Synthetic procedures and characterized data</b>                                 | <b>S2</b>  |
| <b>3. Single crystal structure and theoretical calculation of TRZ-OAC</b>             | <b>S5</b>  |
| <b>4. Electrochemical properties</b>                                                  | <b>S5</b>  |
| <b>5. Photophysical properties</b>                                                    | <b>S6</b>  |
| <b>6. Copies of <sup>1</sup>H NMR and <sup>13</sup>C NMR spectra of new compounds</b> | <b>S11</b> |
| <b>7. X-ray crystallographic data</b>                                                 | <b>S15</b> |
| <b>8. References</b>                                                                  | <b>S18</b> |

## 1. General information

All the reagents were purchased from commercial sources and used without further purification.  $^1\text{H}$  and  $^{13}\text{C}$  NMR spectra were recorded on AVIII 500 MHz NMR spectrometers in  $\text{CDCl}_3$  solutions. High resolution mass spectra were measured on a Thermo Fisher<sup>®</sup> Exactive high resolution LC-MS spectrometer. The calculation was carried out with the Gaussian 09 software package. Geometry optimizations were conducted under the M06-2X/6-31g(d) level of theory. Crystal structures were solved with direct methods and refined with a full-matrix least-squares technique, using the SHELXS software package. Cyclic voltammetry was performed using a CHI600A analyzer with a scan rate of 100 mV/s at room temperature to investigate the oxidation potentials. A conventional three electrode cell was used as electrolytic cell with a glassy carbon working electrode, an  $\text{Ag}/\text{Ag}^+$  (0.01 M  $\text{AgNO}_3$ ) as the reference electrode, and Pt wire as the counter electrode. The oxidation potential was measured in  $\text{CH}_2\text{Cl}_2$  with 0.1 M of tetra-n-butylammonium hexafluorophosphate ( $\text{n-Bu}_4\text{NPF}_6$ ) as a supporting electrolyte.  $\text{Fc}/\text{Fc}^+$  (0.15 eV against  $\text{Ag}/\text{AgNO}_3$ ) used as internal standard for calibrating the reference electrode.

UV-Vis spectra were recorded on PerkinElmer<sup>®</sup> UV/Vis/NIR spectrometer (Lambda 950), and the fluorescence spectra were recorded on HITACHI<sup>®</sup> F-7000 Fluorescence Spectrometer at room temperature. The transient photoluminance decay characteristics and temperature dependence experiments and absolute PL quantum yield were measured on an Edinburgh Instruments FLS980 spectrometer.

## 2. Synthetic procedures and characterized data

Compounds **1**, **2**, **3**, **4** and **OC2A2T** were synthesized according to the literatures.<sup>S1-S4</sup>

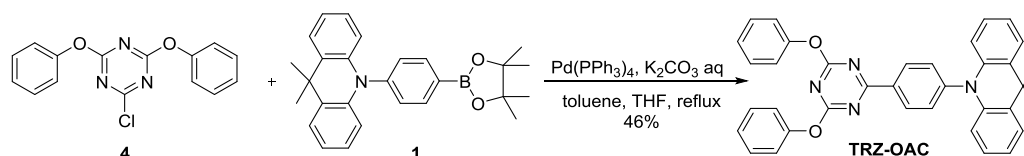

Synthesis of compound **TRZ-OAC**: Compound **1** (1.7 g, 4.0 mmol), compound **4** (599.4 mg, 2.0 mmol),  $\text{Pd}(\text{PPh}_3)_4$  (69.4 mg, 0.06 mmol), 2 M  $\text{K}_2\text{CO}_3$  solution (8 mL),

THF (6 mL) and toluene (16 mL) were added into a two neck flask. The mixture was refluxed under a dry argon atmosphere for 24 h. After cooling to room temperature, the reaction mixture was extracted with dichloromethane, washed with brine and dried over anhydrous Na<sub>2</sub>SO<sub>4</sub>. After the solvent was removed under reduced pressure, the residue was purified by column chromatography to give the target material as a green powder (504.7 mg, 46% yield). Mp: 114-116 °C. <sup>1</sup>H NMR (500 MHz, CDCl<sub>3</sub>): δ 8.52 (d, *J* = 8.4 Hz, 2H), 7.48–7.38 (m, 8H), 7.31–7.24 (m, 6H), 6.99–6.90 (m, 4H), 6.28 (d, *J* = 7.4 Hz, 2H), 1.67 (s, 6H). <sup>13</sup>C NMR (126 MHz, CDCl<sub>3</sub>): δ 175.1, 173.0, 151.8, 146.1, 140.4, 134.1, 131.8, 131.1, 130.6, 129.5, 126.3, 126.0, 125.2, 121.6, 121.0, 114.3, 36.0, 31.0. HR-MS (APCI): *m/z* calcd for C<sub>36</sub>H<sub>28</sub>N<sub>4</sub>O<sub>2</sub><sup>+</sup> [M + H]<sup>+</sup> 548.2212, found 549.2281.

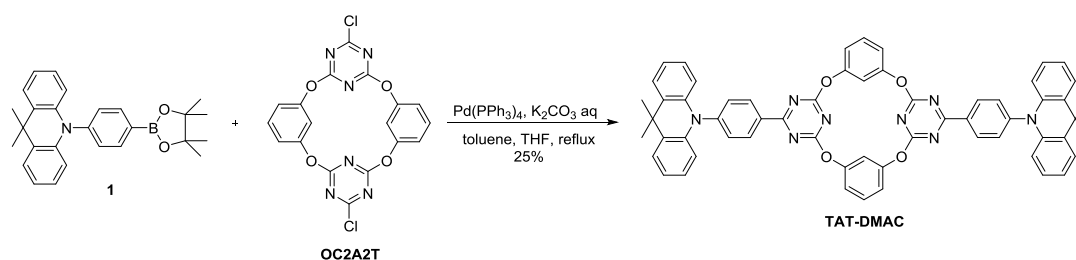

Synthesis of **TAT-DMAC**: Mp: >300 °C. Compound **1** (1.2 g, 3.0 mmol), compound **8** (443.2 mg, 1.0 mmol), Pd(PPh<sub>3</sub>)<sub>4</sub> (34.7 mg, 0.03 mmol), 2 M K<sub>2</sub>CO<sub>3</sub> solution (12 mL), THF (9 mL) and toluene (24 mL) were added into a two neck flask. The mixture was refluxed under a dry argon atmosphere for 24 h. After cooling to room temperature, the reaction mixture was extracted with dichloromethane, washed with brine and dried over anhydrous Na<sub>2</sub>SO<sub>4</sub>. After the solvent was removed under reduced pressure, the residue was purified by column chromatography to give the target material as a green powder (235.1 mg, 25% yield). <sup>1</sup>H NMR (500 MHz, CDCl<sub>3</sub>): δ 8.84 (d, *J* = 8.2 Hz, 4H), 7.56 (d, *J* = 8.2 Hz, 4H), 7.49 (d, *J* = 7.5 Hz, 4H), 7.35 (t, *J* = 8.1 Hz, 2H), 7.06–6.94 (m, 12H), 6.86 (t, *J* = 2.1 Hz, 2H), 6.38 (d, *J* = 7.8 Hz, 4H), 1.71 (s, 12H). <sup>13</sup>C NMR (126 MHz, CDCl<sub>3</sub>): δ 176.4, 173.1, 152.1, 146.5, 140.5, 133.9, 131.9, 131.2, 130.7, 130.5, 126.4, 125.4, 121.1, 119.4, 116.6, 114.4, 36.1, 31.1. HR-MS (APCI): *m/z* calcd for C<sub>60</sub>H<sub>45</sub>O<sub>4</sub>N<sub>8</sub> [M]<sup>+</sup> 941.3558, found 941.3550.

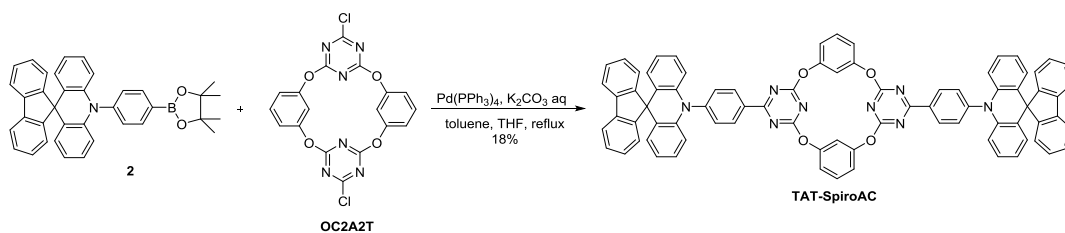

Synthesis of **TAT-SpiroAC**: Mp: >300 °C. A procedure similar to that used for compound **TAT-DMAC** was followed but with compound **2** (1.6 g, 3.0 mmol) instead of compound **1**. The crude product was purified by column chromatography on silica gel to obtain a green powder (639.9 mg, 18% yield). <sup>1</sup>H NMR (500 MHz, CDCl<sub>3</sub>): δ 8.94 (d, *J* = 8.2 Hz, 4H), 7.82 (d, *J* = 7.5 Hz, 4H), 7.72 (d, *J* = 8.3 Hz, 4H), 7.44 (d, *J* = 7.5 Hz, 4H), 7.42–7.35 (m, 6H), 7.29 (d, *J* = 7.4 Hz, 4H), 7.01 (d, *J* = 8.1 Hz, 4H), 6.95 (t, *J* = 7.6 Hz, 4H), 6.90 (s, 2H), 6.60 (t, *J* = 7.4 Hz, 4H), 6.47–6.38 (m, 8H). <sup>13</sup>C NMR (126 MHz, CDCl<sub>3</sub>): δ 176.3, 173.2, 156.5, 152.1, 146.1, 140.8, 139.2, 134.5, 132.1, 131.9, 130.5, 128.4, 128.0, 127.6, 127.3, 125.8, 125.0, 120.9, 119.9, 119.5, 116.6, 114.5, 56.8. HR-MS (APCI): *m/z* calcd for C<sub>80</sub>H<sub>48</sub>O<sub>4</sub>N<sub>8</sub> [M]<sup>+</sup>1185.3871, found 1185.3875.

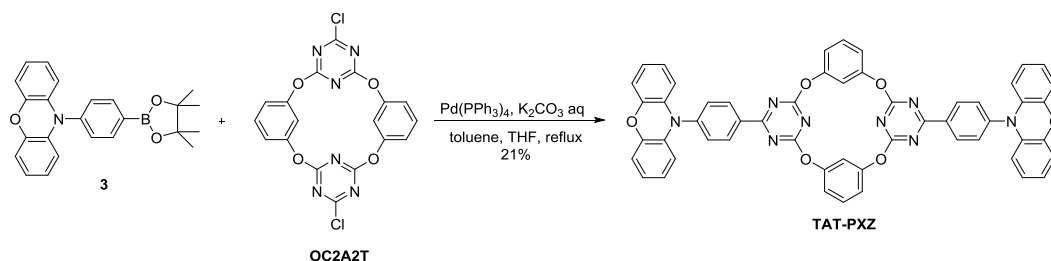

Synthesis of **TAT-PXZ**: Mp: >300 °C. A procedure similar to that used for compound **TAT-DMAC** was followed but with compound **3** (1.2 g, 3.0 mmol) instead of compound **1**. The crude product was purified by column chromatography on silica gel to obtain an orange powder (560.1 mg, 21% yield). <sup>1</sup>H NMR (500 MHz, CDCl<sub>3</sub>): δ 8.80 (d, *J* = 8.4 Hz, 4H), 7.55 (d, *J* = 8.5 Hz, 4H), 7.34 (t, *J* = 8.2 Hz, 2H), 6.97 (dd, *J* = 8.2, 2.2 Hz, 4H), 6.84 (t, *J* = 2.1 Hz, 2H), 6.78–6.57 (m, 12H), 6.02 (d, *J* = 7.9 Hz, 4H). <sup>13</sup>C NMR (126 MHz, CDCl<sub>3</sub>): δ 176.1, 173.1, 152.1, 144.0, 134.3, 133.7, 132.0, 131.1, 130.5, 123.3, 121.8, 119.4, 116.6, 115.7, 113.4. HR-MS (APCI): *m/z* calcd for C<sub>54</sub>H<sub>32</sub>O<sub>6</sub>N<sub>8</sub> [M]<sup>+</sup> 889.2518, found 889.2513.

### 3. Single crystal structure and theoretical calculation

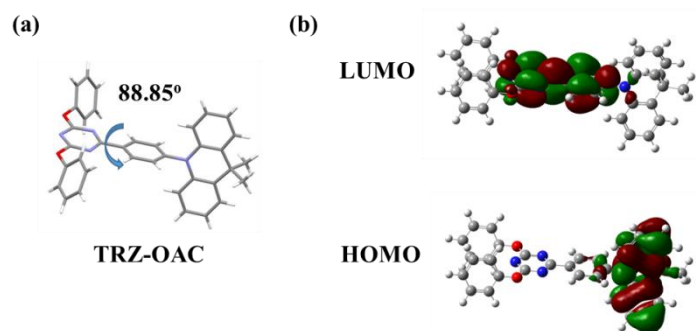

**Fig. S1.** (a) Crystal structure of **TRZ-OAC**. (b) Calculated spatial distributions of the HOMO/LUMO of **TRZ-OAC**.

### 4. Electrochemical properties

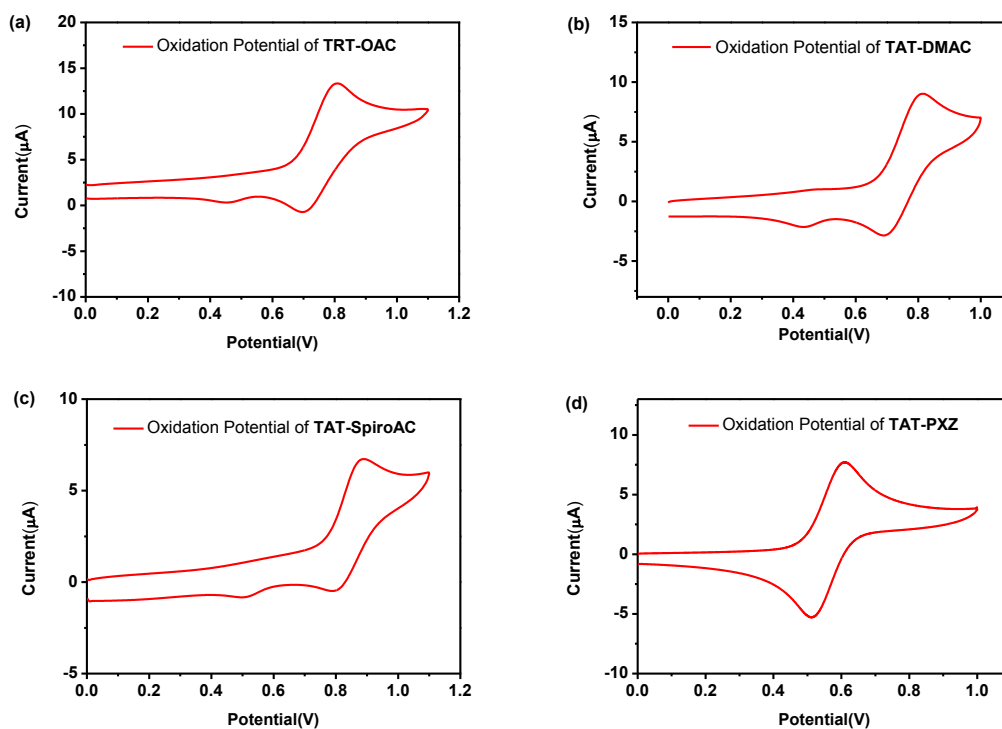

**Fig. S2.** Cyclic voltammetry of **TRZ-OAC**, **TAT-DMAC**, **TAT-SpiroAC** and **TAT-PXZ** with ferrocene as internal standard. Oxidation potential of (a) **TRZ-OAC**, (b) **TAT-DMAC**, (c) **TAT-SpiroAC** and (d) **TAT-PXZ**.

**Table S1.** The electrochemical properties of **TRZ-OAC**, **TAT-DMAC**, **TAT-SpiroAC** and **TAT-PXZ**.

|                    | $E_{\text{ox,onset}}$ V | $E_{\text{HOMO}}$ eV | $E_{\text{LUMO}}$ eV | $E_{\text{g,opt}}$ eV |
|--------------------|-------------------------|----------------------|----------------------|-----------------------|
| <b>TRZ-OAC</b>     | 0.67                    | -5.32                | -2.64                | 2.68                  |
| <b>TAT-DMAC</b>    | 0.67                    | -5.32                | -2.70                | 2.62                  |
| <b>TAT-SpiroAC</b> | 0.77                    | -5.49                | -2.72                | 2.70                  |
| <b>TAT-PXZ</b>     | 0.49                    | -5.41                | -2.67                | 2.47                  |

## 5. Photophysical properties

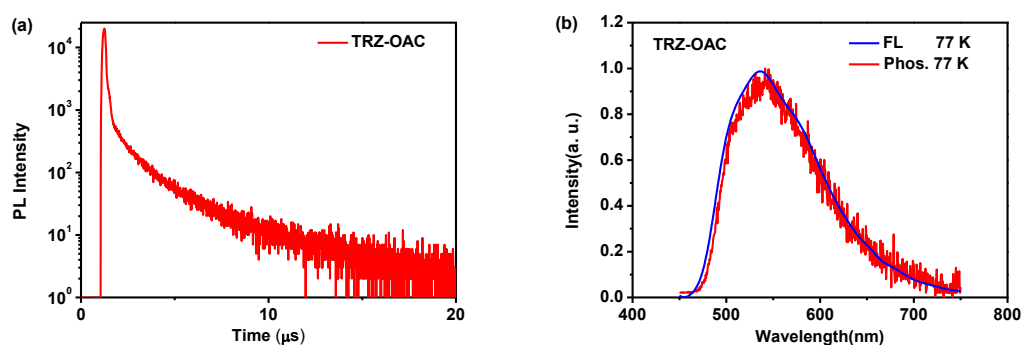

**Fig. S3.** (a) Transient PL spectra of **TRZ-OAC** in neat film at room temperature. (b) Normalized photoluminescence and phosphorescence spectra of **TRZ-OAC** in neat film at 77 K.

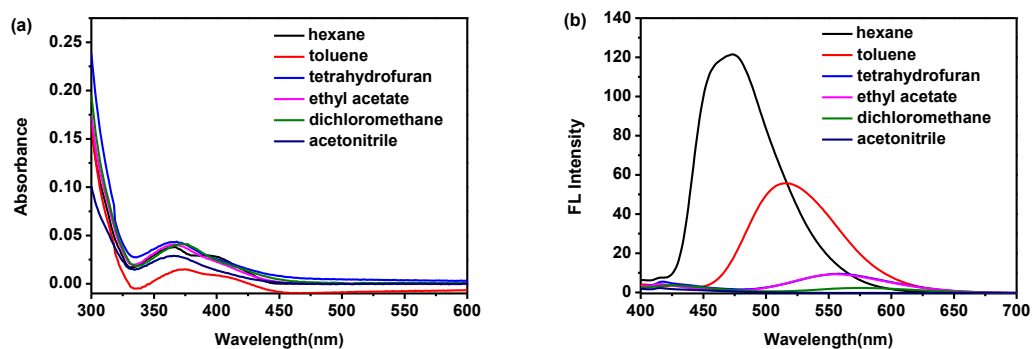

**Fig. S4.** (a) Absorption spectra, (b) fluorescence spectra of **TRZ-OAC** in different solvents at room temperature ( $c = 1.0 \times 10^{-5}$  M).

**Table S2.** Absorption and emission characteristics of **TRZ-OAC** in different solvents at room temperature ( $c = 1.0 \times 10^{-5}$  M).

| solvent         | $\lambda_{\text{abs}}$ (nm) | $\lambda_{\text{em}}$ (nm) |
|-----------------|-----------------------------|----------------------------|
| hexane          | 367                         | 473                        |
| toluene         | 375                         | 515                        |
| THF             | 368                         | 557                        |
| ethyl acetate   | 366                         | 554                        |
| dichloromethane | 366                         | 578                        |
| acetonitrile    | 366                         | N.D.                       |

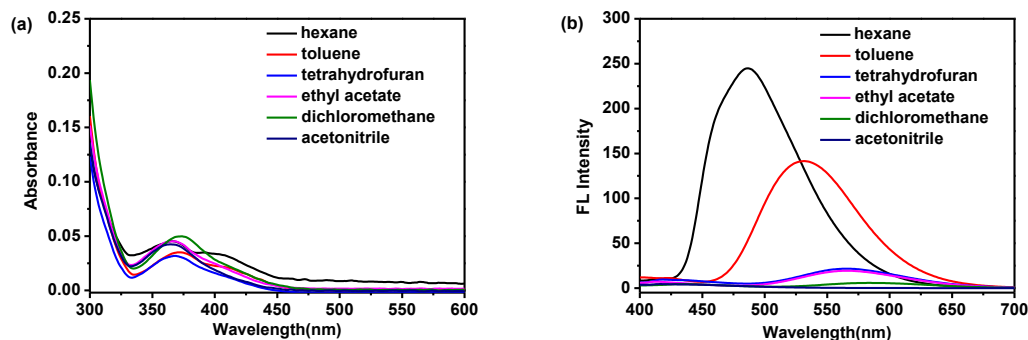

**Fig. S5.** (a) Absorption spectra, (b) fluorescence spectra of **TAT-DMAC** in different solvents at room temperature ( $c = 1.0 \times 10^{-5}$  M).

**Table S3.** Absorption and emission characteristics of **TAT-DMAC** in different solvents at room temperature ( $c = 1.0 \times 10^{-5}$  M).

| solvent         | $\lambda_{\text{abs}}$ (nm) | $\lambda_{\text{em}}$ (nm) |
|-----------------|-----------------------------|----------------------------|
| hexane          | 365                         | 486                        |
| toluene         | 372                         | 531                        |
| THF             | 367                         | 565                        |
| ethyl acetate   | 366                         | 565                        |
| dichloromethane | 376                         | 584                        |
| acetonitrile    | 365                         | N.D.                       |

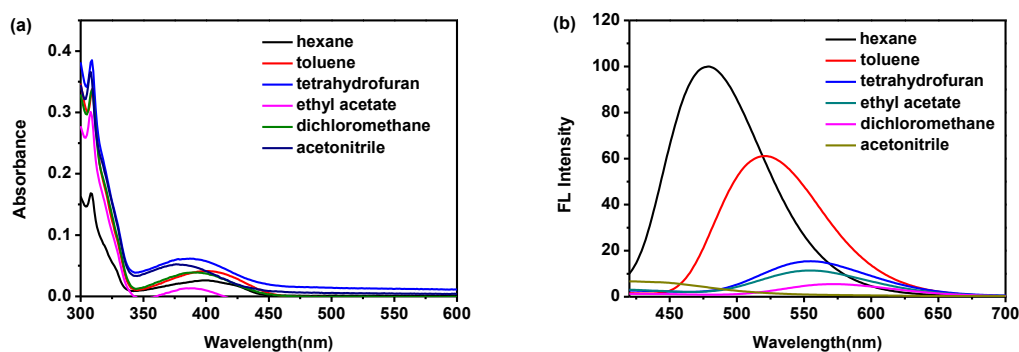

**Fig. S6.** (a) Absorption spectra, (b) fluorescence spectra of **TAT-SpiroAC** in different solvents at room temperature ( $c = 1.0 \times 10^{-5}$  M).

**Table S4.** Absorption and emission characteristics of **TAT-SpiroAC** in different solvents at room temperature ( $c = 1.0 \times 10^{-5}$  M).

| solvent         | $\lambda_{\text{abs}}$ (nm) | $\lambda_{\text{em}}$ (nm) |
|-----------------|-----------------------------|----------------------------|
| hexane          | 402                         | 479                        |
| toluene         | 401                         | 521                        |
| THF             | 387                         | 555                        |
| ethyl acetate   | 389                         | 554                        |
| dichloromethane | 389                         | 574                        |
| acetonitrile    | 376                         | N.D.                       |

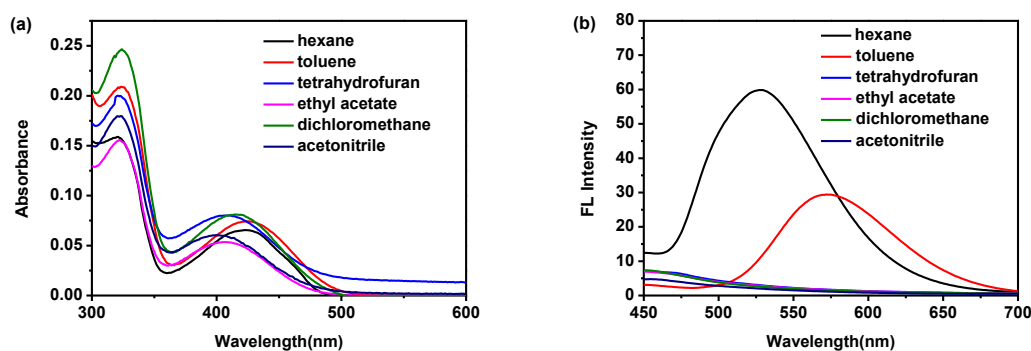

**Fig. S7.** (a) Absorption spectra, (b) fluorescence spectra of **TAT-PXZ** in different solvents at room temperature ( $c = 1.0 \times 10^{-5}$  M).



**Table S5.** Absorption and emission characteristics of **TAT-PXZ** in different solvents at room temperature ( $c = 1.0 \times 10^{-5}$  M).

| solvent         | $\lambda_{\text{abs}}$ (nm) | $\lambda_{\text{em}}$ (nm) |
|-----------------|-----------------------------|----------------------------|
| hexane          | 423                         | 528                        |
| toluene         | 426                         | 572                        |
| THF             | 409                         | N.D.                       |
| ethyl acetate   | 408                         | N.D.                       |
| dichloromethane | 415                         | N.D.                       |
| acetonitrile    | 399                         | N.D.                       |

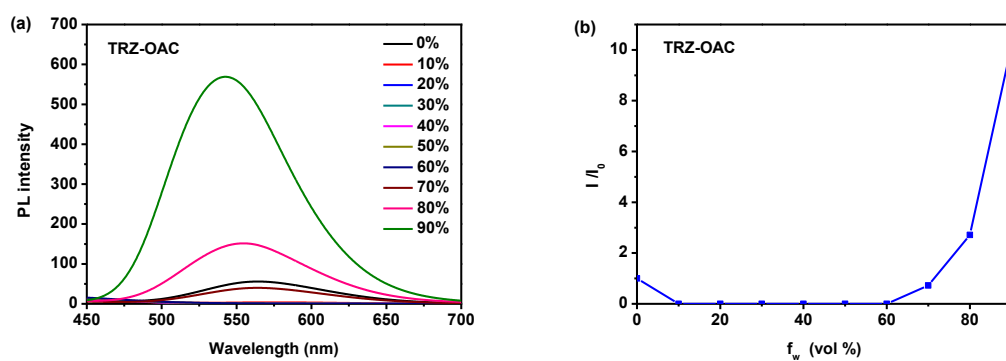

**Fig. S8.** (a) PL spectra of **TRZ-OAC** in THF/H<sub>2</sub>O mixtures with different  $f_w$ . (b) Plots of the  $I/I_0$  of the THF/H<sub>2</sub>O mixtures of **TRZ-OAC**.

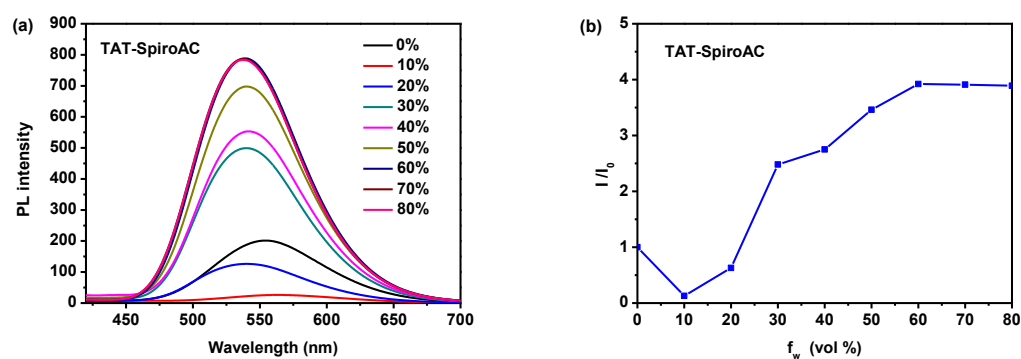

**Fig. S9.** (a) PL spectra of **TAT-SpiroAC** in THF/H<sub>2</sub>O mixtures with different  $f_w$ . (b) Plots of the  $I/I_0$  of the THF/H<sub>2</sub>O mixtures of **TAT-SpiroAC**.

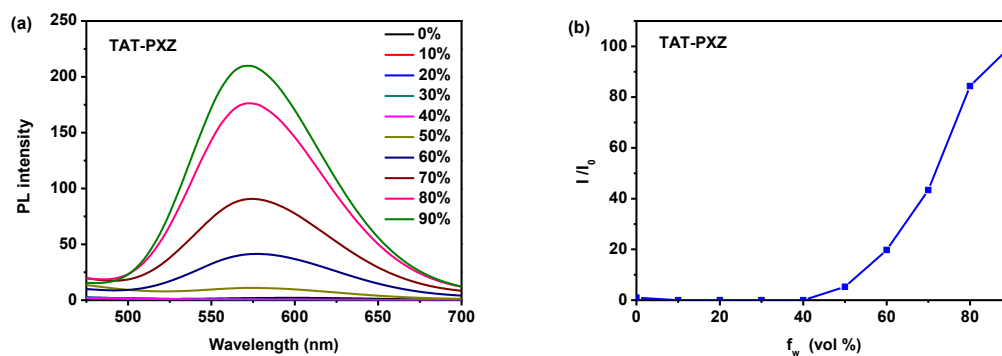

**Fig. S10.** (a) PL spectra of **TAT-PXZ** in THF/H<sub>2</sub>O mixtures with different  $f_w$ . (b) Plots of the  $I/I_0$  of the THF/H<sub>2</sub>O mixtures of **TAT-PXZ**.

**Table S6.** PLQYs of **TRZ-OAC**, **TAT-DMAC**, **TAT-SpiroAC** and **TAT-PXZ** in thin film.

|                   | <b>TRZ-OAC</b> | <b>TAT-DMAC</b> | <b>TAT-SpiroAC</b> | <b>TAT-PXZ</b> |
|-------------------|----------------|-----------------|--------------------|----------------|
| <b>atmosphere</b> | 47.2%          | 50.5%           | 48.7%              | 12.8%          |
| <b>vacuum</b>     | 50.4%          | 65.0%           | 60.3%              | 16.8%          |

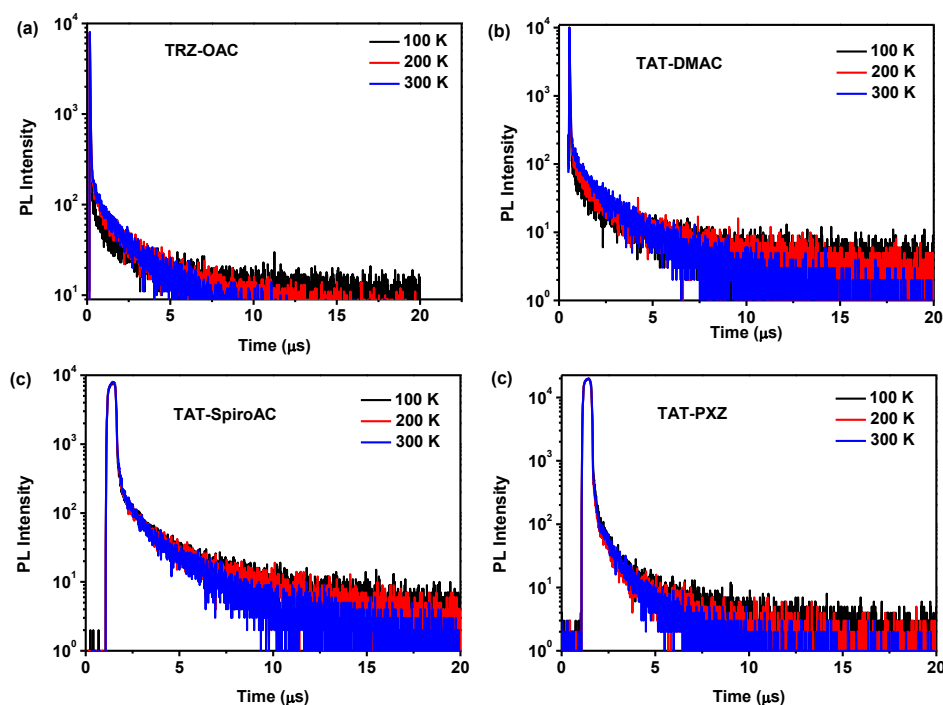

**Fig. S11.** Temperature-dependent transient PL decay spectra of **TRZ-OAC**, **TAT-DMAC**, **TAT-SpiroAC** and **TAT-PXZ** in neat film.

## 6. Copies of $^1\text{H}$ NMR and $^{13}\text{C}$ NMR spectra of new compounds

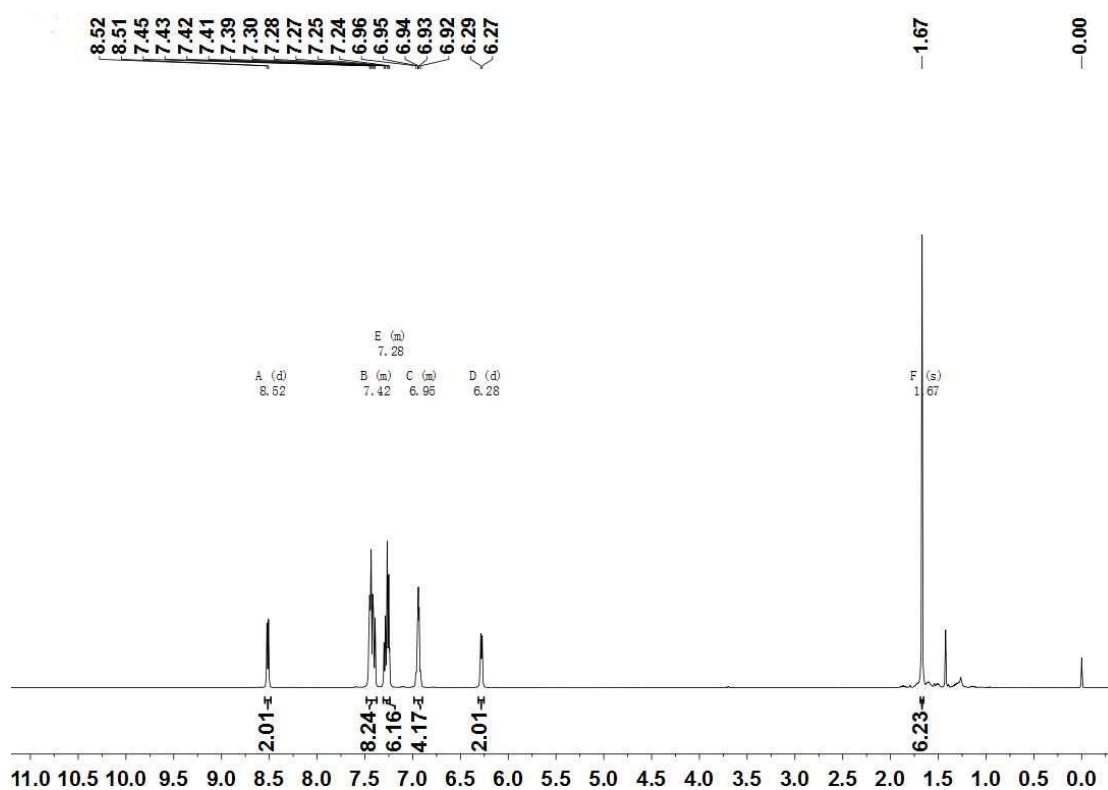

**Fig. S12.**  $^1\text{H}$  NMR spectrum of TRZ-OAC in  $\text{CDCl}_3$  (500 MHz, 298 K).

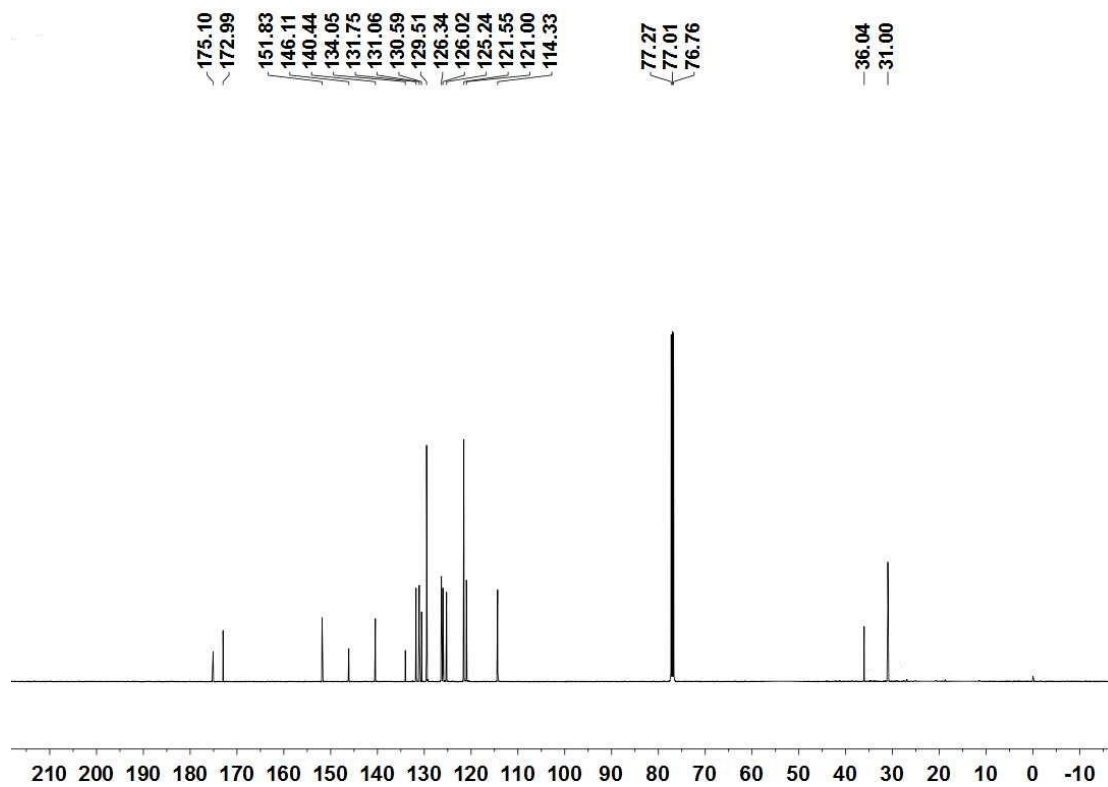

**Fig. S13.**  $^{13}\text{C}$  NMR spectrum of TRZ-OAC in  $\text{CDCl}_3$  (126 MHz, 298 K).

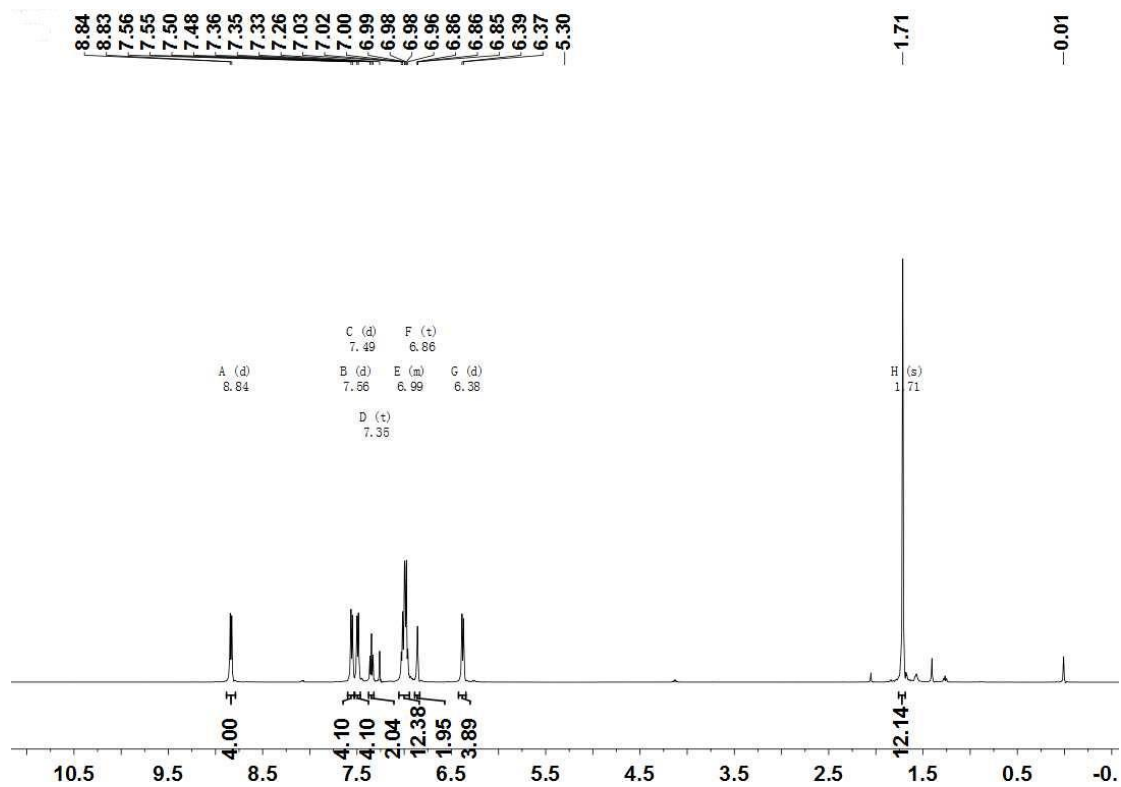

Fig. S14.  $^1\text{H}$  NMR spectrum of TAT-DMAC in  $\text{CDCl}_3$  (500 MHz, 298 K).

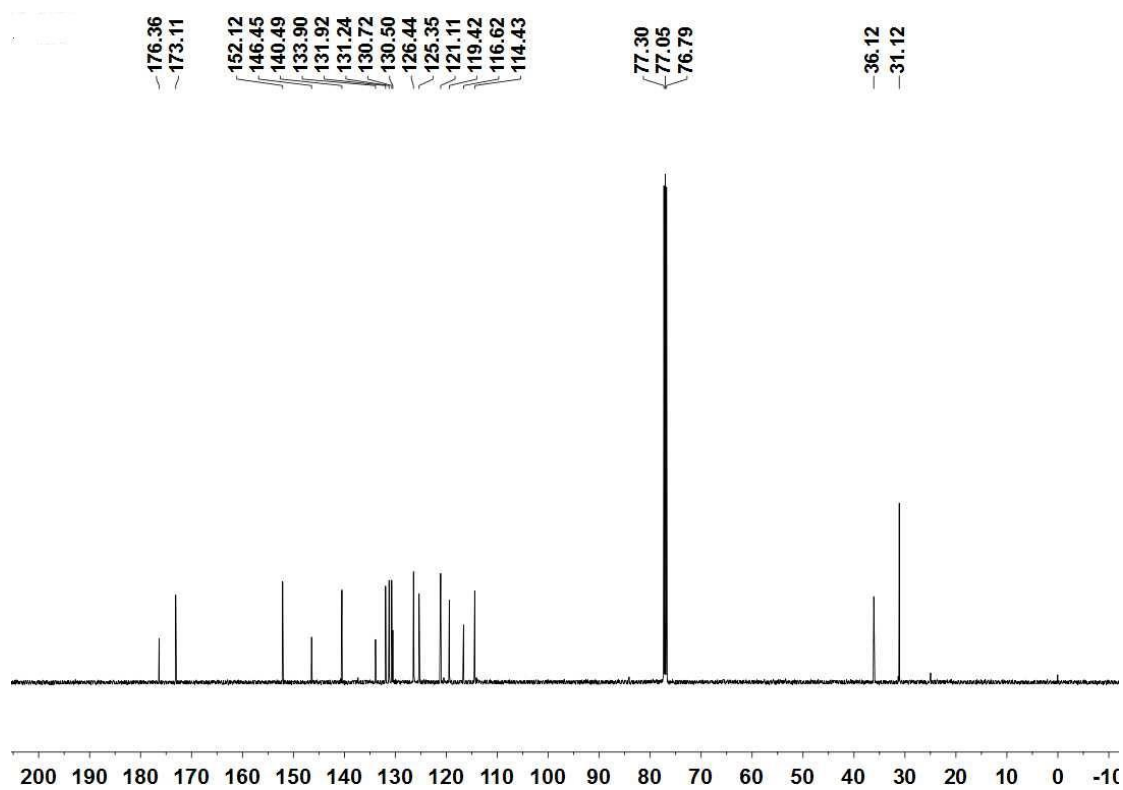

Fig. S15.  $^{13}\text{C}$  NMR spectrum of TAT-DMAC in  $\text{CDCl}_3$  (126 MHz, 298 K).

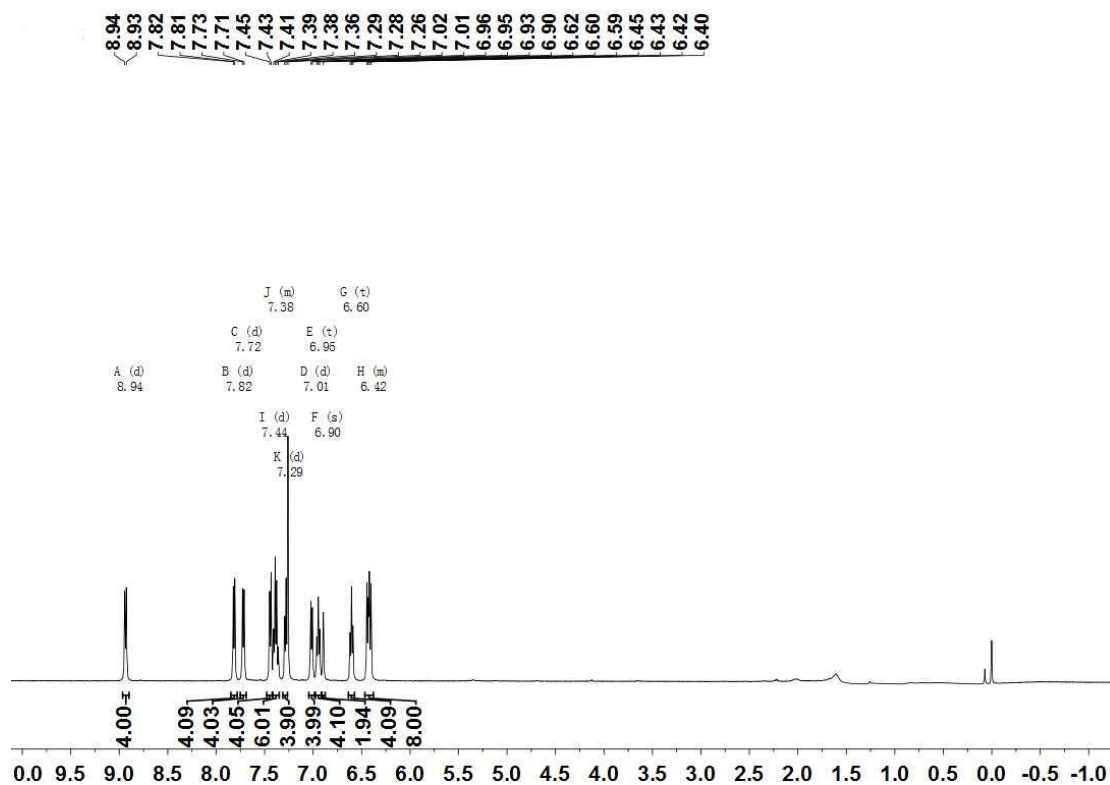

**Fig. S16.**  $^1\text{H}$  NMR spectrum of TAT-SpiroAC in  $\text{CDCl}_3$  (500 MHz, 298 K).

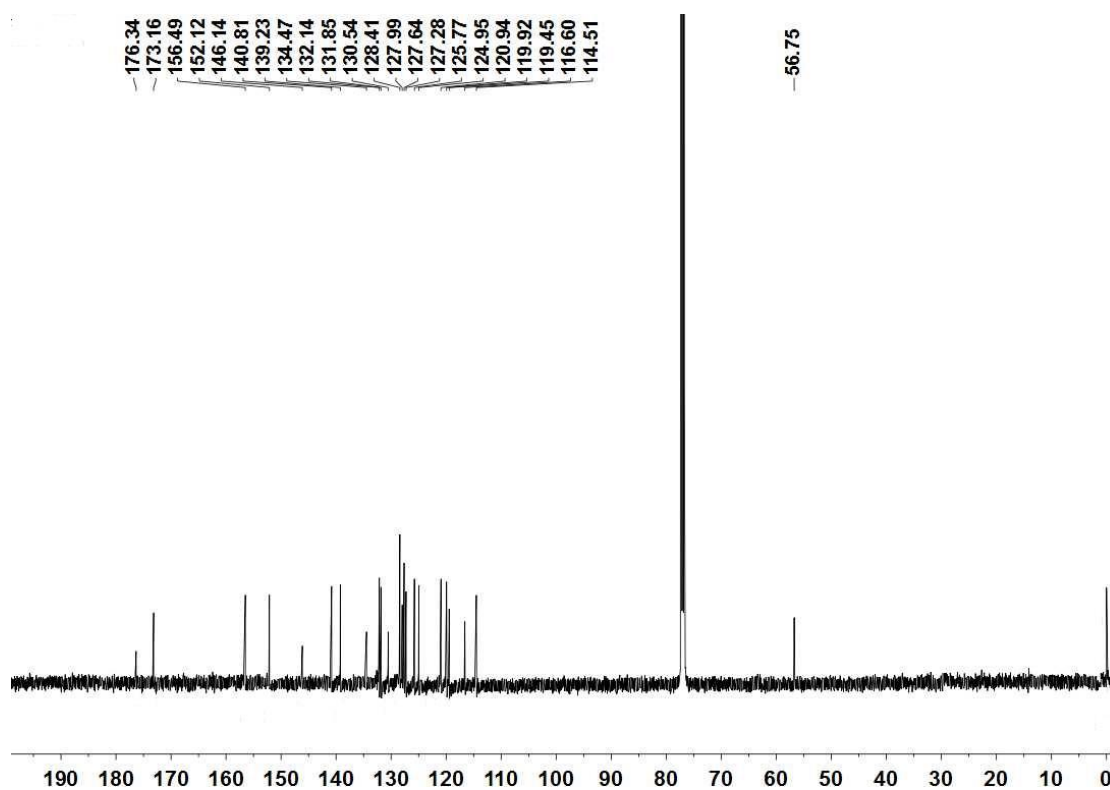

**Fig. S17.**  $^{13}\text{C}$  NMR spectrum of TAT-SpiroAC in  $\text{CDCl}_3$  (126 MHz, 298 K).

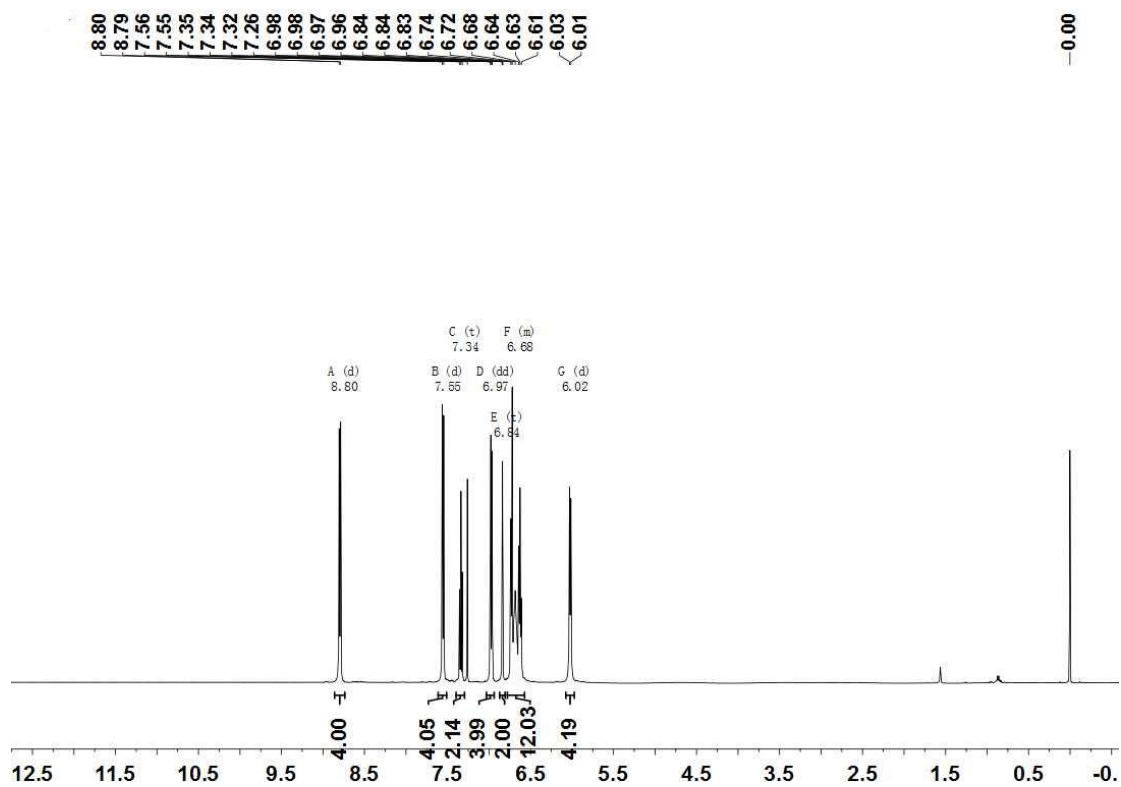

**Fig. S18.**  $^1\text{H}$  NMR spectrum of TAT-PXZ in  $\text{CDCl}_3$  (500 MHz, 298 K).

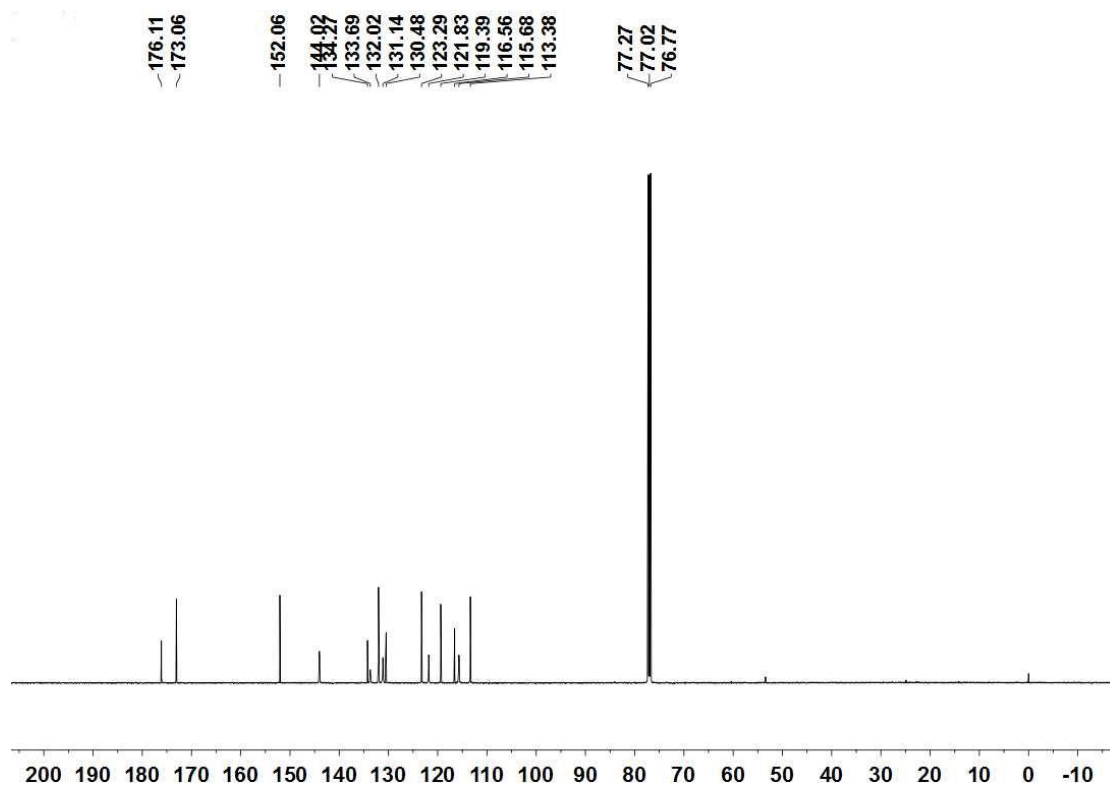

**Fig. S19.**  $^{13}\text{C}$  NMR spectrum of TAT-PXZ in  $\text{CDCl}_3$  (126 MHz, 298 K).

## 7. X-ray crystallographic data

**Table S7.** Single crystal data of compound **TRZ-OAC** (CCDC: 1922443).

|                                   |                                                                                                        |
|-----------------------------------|--------------------------------------------------------------------------------------------------------|
| Identification code               | tx401                                                                                                  |
| Empirical formula                 | C <sub>36</sub> H <sub>28</sub> N <sub>4</sub> O <sub>2</sub>                                          |
| Formula weight                    | 548.62                                                                                                 |
| Temperature                       | 170.01(10) K                                                                                           |
| Wavelength                        | 1.54184 Å                                                                                              |
| Crystal system                    | Orthorhombic                                                                                           |
| Space group                       | P n n a                                                                                                |
| Unit cell dimensions              | a = 11.45750(10) Å      α = 90°.<br>b = 10.69620(10) Å      β = 90°.<br>c = 27.0458(2) Å      γ = 90°. |
| Volume                            | 3314.51(5) Å <sup>3</sup>                                                                              |
| Z                                 | 4                                                                                                      |
| Density (calculated)              | 1.099 Mg/m <sup>3</sup>                                                                                |
| Absorption coefficient            | 0.550 mm <sup>-1</sup>                                                                                 |
| F(000)                            | 1152                                                                                                   |
| Crystal size                      | 0.355 x 0.345 x 0.324 mm <sup>3</sup>                                                                  |
| Theta range for data collection   | 4.445 to 75.336 °                                                                                      |
| Index ranges                      | -12 ≤ h ≤ 13, -13 ≤ k ≤ 13,<br>-33 ≤ l ≤ 33                                                            |
| Reflections collected             | 30875                                                                                                  |
| Independent reflections           | 3289 [R(int) = 0.0223]                                                                                 |
| Completeness to theta = 67.684 °  | 99.3 %                                                                                                 |
| Absorption correction             | Semi-empirical from equivalents                                                                        |
| Max. and min. transmission        | 1.00000 and 0.64137                                                                                    |
| Refinement method                 | Full-matrix least-squares on F <sup>2</sup>                                                            |
| Data / restraints / parameters    | 3289 / 0 / 194                                                                                         |
| Goodness-of-fit on F <sup>2</sup> | 1.053                                                                                                  |
| Final R indices [I > 2σ(I)]       | R1 = 0.0404, wR2 = 0.1154                                                                              |
| R indices (all data)              | R1 = 0.0431, wR2 = 0.1217                                                                              |
| Extinction coefficient            | n/a                                                                                                    |
| Largest diff. peak and hole       | 0.201 and -0.184 e.Å <sup>-3</sup>                                                                     |

**Table S8.** Single crystal data of compound **TAT-DMAC** (CCDC: 1922444).

|                                                          |                                                               |
|----------------------------------------------------------|---------------------------------------------------------------|
| Identification code                                      | tx457_sq                                                      |
| Empirical formula                                        | C <sub>60</sub> H <sub>44</sub> N <sub>8</sub> O <sub>4</sub> |
| Formula weight                                           | 941.03                                                        |
| Temperature/K                                            | 170.00(10)                                                    |
| Crystal system                                           | monoclinic                                                    |
| Space group                                              | P2 <sub>1</sub> /c                                            |
| a/Å                                                      | 9.64598(5)                                                    |
| b/Å                                                      | 27.23322(15)                                                  |
| c/Å                                                      | 18.74004(10)                                                  |
| α/°                                                      | 90                                                            |
| β/°                                                      | 101.9258(5)                                                   |
| γ/°                                                      | 90                                                            |
| Volume/Å <sup>3</sup>                                    | 4816.58(5)                                                    |
| Z                                                        | 4                                                             |
| ρ <sub>calc</sub> /g/cm <sup>3</sup>                     | 1.298                                                         |
| μ/mm <sup>-1</sup>                                       | 0.666                                                         |
| F(000)                                                   | 1968.0                                                        |
| Crystal size/mm <sup>3</sup>                             | 0.257 × 0.213 × 0.15                                          |
| Radiation                                                | CuKα (λ = 1.54184)                                            |
| 2θ range for data collection/°                           | 5.81 to 151.012                                               |
| Index ranges                                             | -11 ≤ h ≤ 12, -30 ≤ k ≤ 33, -23 ≤ l ≤ 23                      |
| Reflections collected                                    | 34940                                                         |
| Independent reflections                                  | 9511 [R <sub>int</sub> = 0.0195, R <sub>sigma</sub> = 0.0167] |
| Data/restraints/parameters                               | 9511/1/653                                                    |
| Goodness-of-fit on F <sup>2</sup>                        | 1.054                                                         |
| Final R indexes [I >= 2σ (I)]                            | R <sub>1</sub> = 0.0466, wR <sub>2</sub> = 0.1306             |
| Final R indexes [all data]                               | R <sub>1</sub> = 0.0510, wR <sub>2</sub> = 0.1355             |
| Largest diff. peak/hole / e <sup>-</sup> Å <sup>-3</sup> | 0.59/-0.21                                                    |

**Table S9.** Single crystal data of compound **TAT-SpiroAC** (CCDC: 1922445).

|                     |                                                               |
|---------------------|---------------------------------------------------------------|
| Identification code | tx402a_sq                                                     |
| Empirical formula   | C <sub>80</sub> H <sub>48</sub> N <sub>8</sub> O <sub>4</sub> |
| Formula weight      | 1185.26                                                       |
| Temperature         | 169.99(10) K                                                  |
| Wavelength          | 1.54178 Å                                                     |
| Crystal system      | Monoclinic                                                    |



|                                   |                                             |                             |
|-----------------------------------|---------------------------------------------|-----------------------------|
| Space group                       | P 1 21/n 1                                  |                             |
| Unit cell dimensions              | a = 14.9786(4) Å                            | $\alpha = 90^\circ$ .       |
|                                   | b = 9.0590(2) Å                             | $\beta = 94.208(2)^\circ$ . |
|                                   | c = 57.2212(11) Å                           | $\gamma = 90^\circ$ .       |
| Volume                            | 7743.5(3) Å <sup>3</sup>                    |                             |
| Z                                 | 4                                           |                             |
| Density (calculated)              | 1.017 Mg/m <sup>3</sup>                     |                             |
| Absorption coefficient            | 0.507 mm <sup>-1</sup>                      |                             |
| F(000)                            | 2464                                        |                             |
| Crystal size                      | 0.245 x 0.034 x 0.023 mm <sup>3</sup>       |                             |
| Theta range for data collection   | 3.002 to 75.626 °                           |                             |
| Index ranges                      | -17<=h<=18, -11<=k<=8, -71<=l<=71           |                             |
| Reflections collected             | 52610                                       |                             |
| Independent reflections           | 15105 [R(int) = 0.0615]                     |                             |
| Completeness to theta = 67.679 °  | 98.3 %                                      |                             |
| Absorption correction             | Semi-empirical from equivalents             |                             |
| Max. and min. transmission        | 1.00000 and 0.69174                         |                             |
| Refinement method                 | Full-matrix least-squares on F <sup>2</sup> |                             |
| Data / restraints / parameters    | 15105 / 0 / 829                             |                             |
| Goodness-of-fit on F <sup>2</sup> | 1.089                                       |                             |
| Final R indices [I>2sigma(I)]     | R1 = 0.0832, wR2 = 0.2327                   |                             |
| R indices (all data)              | R1 = 0.0968, wR2 = 0.2421                   |                             |
| Extinction coefficient            | n/a                                         |                             |
| Largest diff. peak and hole       | 0.369 and -0.330 e.Å <sup>-3</sup>          |                             |

**Table S10.** Single crystal data of compound **TAT-PXZ** (CCDC: 1922447).

|                      |                                                               |                             |
|----------------------|---------------------------------------------------------------|-----------------------------|
| Identification code  | tx372b_sq                                                     |                             |
| Empirical formula    | C <sub>54</sub> H <sub>32</sub> N <sub>8</sub> O <sub>6</sub> |                             |
| Formula weight       | 888.87                                                        |                             |
| Temperature          | 173(2) K                                                      |                             |
| Wavelength           | 1.54178 Å                                                     |                             |
| Crystal system       | Monoclinic                                                    |                             |
| Space group          | P 1 2/c 1                                                     |                             |
| Unit cell dimensions | a = 19.6993(3) Å                                              | $\alpha = 90^\circ$ .       |
|                      | b = 13.7805(2) Å                                              | $\beta = 92.071(2)^\circ$ . |
|                      | c = 17.3821(3) Å                                              | $\gamma = 90^\circ$ .       |
| Volume               | 4715.57(13) Å <sup>3</sup>                                    |                             |
| Z                    | 4                                                             |                             |

|                                   |                                             |
|-----------------------------------|---------------------------------------------|
| Density (calculated)              | 1.252 Mg/m <sup>3</sup>                     |
| Absorption coefficient            | 0.686 mm <sup>-1</sup>                      |
| F(000)                            | 1840                                        |
| Crystal size                      | 0.285 x 0.184 x 0.054 mm <sup>3</sup>       |
| Theta range for data collection   | 2.244 to 75.519 °                           |
| Index ranges                      | -22<=h<=24, -17<=k<=16,<br>-20<=l<=21       |
| Reflections collected             | 33472                                       |
| Independent reflections           | 9395 [R(int) = 0.0201]                      |
| Completeness to theta = 67.679 °  | 99.7 %                                      |
| Absorption correction             | Semi-empirical from equivalents             |
| Max. and min. transmission        | 1.000 and 0.60295                           |
| Refinement method                 | Full-matrix least-squares on F <sup>2</sup> |
| Data / restraints / parameters    | 9395 / 1 / 613                              |
| Goodness-of-fit on F <sup>2</sup> | 1.069                                       |
| Final R indices [I>2sigma(I)]     | R1 = 0.0644, wR2 = 0.1927                   |
| R indices (all data)              | R1 = 0.0821, wR2 = 0.2088                   |
| Extinction coefficient            | n/a                                         |
| Largest diff. peak and hole       | 0.184 and -0.141 e.Å <sup>-3</sup>          |

## 8. References

1. G. Xie , X. Li , D. Chen , Z. Wang , X. Cai , D. Chen , Y. Li , K. Liu , Y. Cao and S.-J. Su, *Adv. Mater.*, 2016, **28**, 181-187.
2. B. Li, Z. Li, T. Hu, Y. Zhang, Y. Wang, Y. Yi, F. Guo and L. Zhao, *J. Mater. Chem. C*, 2018, **6**, 2351-2359.
3. M. M. Rothmann, S. Haneder, E. D. Como, C. Lennartz, C. Schildknecht and P. Strohriegl, *Chem. Mater.*, 2010, **22**, 2403-2410.
4. M.-X. Wang and H.-B. Yang, *J. Am. Chem. Soc.*, 2004, **126**, 15412-15422.
